# Supplementary material for: Anti-Inflammatory Properties of Eugenol in Lipopolysaccharide-Induced Macrophages and Its Role in Preventing β-Cell Dedifferentiation and Loss Induced by High Glucose-High Lipid Conditions
Source: MDPI journal article supplement (doi:10.3390/molecules28227619), 2023-11-16
Supplement: s1 [file s1]

## Supplementary materials

**Table S1. The information of primary antibodies used in the experiments**

| <b>Primary antibody</b>       | <b>Manufacture</b>        | <b>Cat #</b> | <b>Dilution</b> |
|-------------------------------|---------------------------|--------------|-----------------|
| Nlrp3                         | Cell Signaling Technology | 15101S       | 1:1000          |
| Phospho-NFκB-p65 (ser536)     | Cell Signaling Technology | 13346S       | 1:1000          |
| NFκB p-65                     | Santa Cruz Biotechnology  | sc-8008      | 1:200           |
| Phospho-TYK 2 (Tyr-1054/1055) | Cell Signaling Technology | 9321S        | 1:500           |
| TNF-α                         | Cell Signaling Technology | 3707         | 1:500           |
| PANX-1                        | Cell Signaling Technology | 91137S       | 1:1000          |
| Cox-2                         | Cell Signaling Technology | 12282        | 1:1000          |
| β-actin                       | Santa Cruz Biotechnology  | sc-47778     | 1:200           |
| GAPDH                         | Santa Cruz Biotechnology  | sc-32233     | 1:200           |
| Phospho-STAT3(Tyr-705)        | Santa Cruz Biotechnology  | sc-8059      | 1:200           |
| STAT3                         | Santa Cruz Biotechnology  | sc-8019      | 1:200           |
| Pro-Caspase1                  | Santa Cruz Biotechnology  | sc-392736    | 1:200           |
| IL-1β                         | Abcam                     | ab216995     | 1:500           |
| β-Actin                       | Abcam                     | ab8227       | 1:2000          |
| GAPDH                         | Cell Signaling Technology | 2118         | 1:1000          |
| α-Tubulin                     | Santa Cruz Biotechnology  | sc-8035      | 1:200           |
| IL-6                          | Cell Signaling Technology | 12153        | 1:1000          |
| TYK2                          | Cell Signaling Technology | 14193S       | 1:1000          |
| Caspase-3                     | Cell Signaling Technology | 9662s        | 1:200           |
| Caspase-7                     | Cell Signaling Technology | 12827        | 1:1000          |
| Cleaved PARP                  | Cell Signaling Technology | 9545s        | 1:250           |
| PDX-1                         | Cell Signaling Technology | D59H3        | 1:1000          |
| FOXO1                         | Cell Signaling Technology | 2880S        | 1:1000          |
| Phospho-FOXO1 (Ser256)        | Cell Signaling Technology | 9461S        | 1:1000          |
| TXNIP                         | Cell Signaling Technology | 14716S       | 1:1000          |

**Table S2. The sequences of primers used for qRT-PCR.**

|                                      |         |                        |
|--------------------------------------|---------|------------------------|
| <i>Rat-Ins1</i>                      | Forward | GGGAACGTGGTTTCTTCTACA  |
| <i>Rat-Ins1</i>                      | Reverse | CAGTGCCAAGGTCTGAAGAT   |
| <i>Rat-NEUROD1</i>                   | Forward | GAACACGAGGCAGACAAGAA   |
| <i>Rat-NEUROD1</i>                   | Reverse | TCATCTTCATCCTCCTCCTCTC |
| <i>Rat-MafA</i>                      | Forward | GGTCATCCGACTGAAACAGAA  |
| <i>Rat-MafA</i>                      | Reverse | CTTCTCGCTCTCCAGAATGTG  |
| <i>Rat-Ins2</i>                      | Forward | GGGAGCGTGGATTCTTCTACA  |
| <i>Rat-Ins2</i>                      | Reverse | AGTGCCAAGGTCTGAAGGT    |
| <i>Rat-Slc2A2</i>                    | Forward | CATAGTCACACCAGCACATACG |
| <i>Rat-Slc2A2</i>                    | Reverse | ACAGACAGAGACCAGAGCATAG |
| <i>Rat-PDX1</i>                      | Forward | CCCTTTCCCGTGGATGAAATC  |
| <i>Rat-PDX1</i>                      | Reverse | GCTGTACGGGTCCTCTTATTCT |
| <i>Rat-FOXO1</i>                     | Forward | TCTACGAGTGGATGGTGAAGAG |
| <i>Rat-FOXO1</i>                     | Reverse | GGACAGATTGTGGCGAATTGA  |
| <i>Rat-Tubulin</i>                   | Forward | TGACCCTCGCCATGGTAAATA  |
| <i>Rat-Tubulin</i>                   | Reverse | GATGGTACGCTTGGTCTTGATG |
| <i>Human-IL-6</i>                    | Forward | GGAGACTTGCCTGGTGAAA    |
| <i>Human-IL-6</i>                    | Reverse | CTGGCTTGTTCTCACTACTC   |
| <i>Human-COX-2</i>                   | Forward | TACTGGAAGCCAAGCACTTT   |
| <i>Human-COX-2</i>                   | Reverse | GGACAGCCCTTCACGTTATT   |
| <i>Human-TNF-<math>\alpha</math></i> | Forward | CCAGGGACCTCTCTCTAATCA  |
| <i>Human-TNF-<math>\alpha</math></i> | Reverse | TCAGCTTGAGGGTTTGCTAC   |
| <i>Human-Pannexin-1 (PANX-1)</i>     | Forward | GTGTGCAGCATCAAATCAGG   |
| <i>Human-Pannexin-1 (PANX-1)</i>     | Reverse | GACACTGAGCAACTGGAAGA   |
| <i>Human-ADAR1</i>                   | Forward | GTCATCAATGGCCGAGAGTT   |
| <i>Human-ADAR1</i>                   | Reverse | CTTGGCTTTGGCTTCCTCTA   |
| <i>Human-Nlrp3</i>                   | Forward | GAAGAGGAGTGGATGGGTTTAC |
| <i>Human-Nlrp3</i>                   | Reverse | TCTGCTTCTCACGTACTTTCTG |
| <i>Human-IL-1<math>\beta</math></i>  | Forward | CCTTAGGGTAGTGCTAAGAGGA |
| <i>Human-IL-1<math>\beta</math></i>  | Reverse | AAGTGAGTAGGAGAGGTGAGAG |
| <i>Human-ACTIN</i>                   | Forward | GGCATCCTCACCCTGAAGTA   |
| <i>Human-ACTIN</i>                   | Reverse | CACACGCAGCTCATTGTAGAAG |
| <i>Human-GAPDH</i>                   | Forward | CAGGAGGCATTGCTGATGAT   |
| <i>Human-GAPDH</i>                   | Reverse | GAAGGCTGGGGCTCATTT     |
